# Supplementary material for: Potential for intranasal drug delivery to alter cerebrospinal fluid outflow via the nasal turbinate lymphatics
Source: PubMed Central journal article supplement (PMC3927830; doi:10.1186/2045-8118-11-4), 2014-02-15

**A.**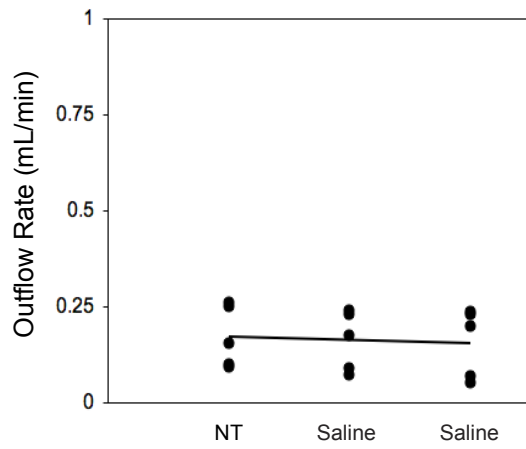**B.**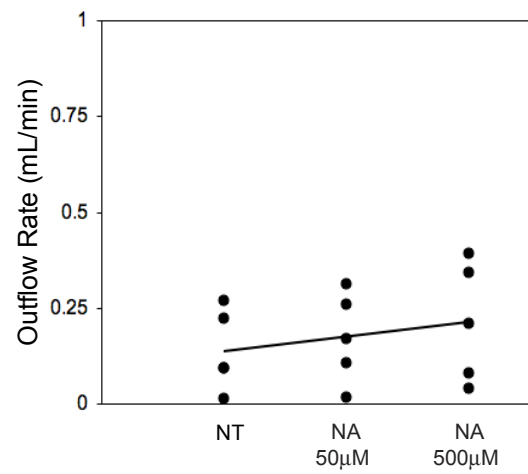**C.**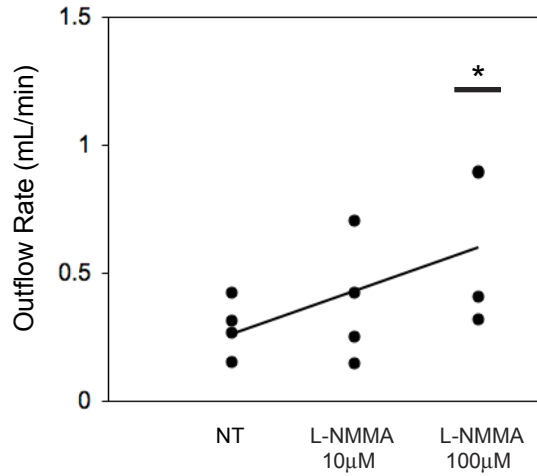**D.**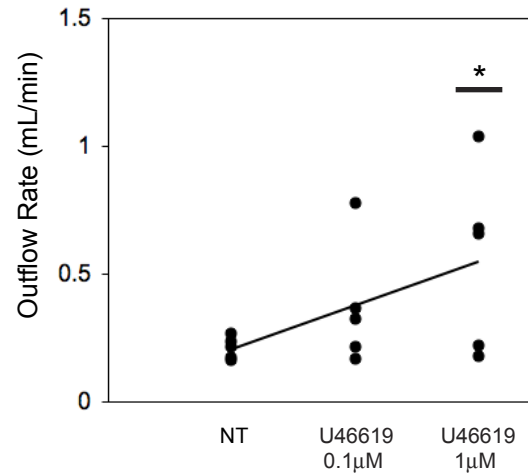

Supplement: 2045-8118-11-4-S1.pdf [file 2045-8118-11-4-S1.pdf]
